# Supplementary material for: Van der Waals integration of phase-pure 2D perovskite sheets and GaAs nanowires for self-driven photodetector
Source: Royal Society of Chemistry journal article supplement (doi:10.1039/d4tc02994a), 2024-01-01
Supplement: d4tc02994a1.pdf [file d4tc02994a1.pdf]

## Supplementary Information for

# Van der Waals Integration of Phase-pure 2D Perovskite Sheets and GaAs Nanowires for Self-driven Photodetector

Zhi-Hong Zhang<sup>1, 2</sup>, Xiao-Bing Hou<sup>1</sup>, Shang-Heng Li<sup>1</sup>, Zhi-Peng Wei<sup>1, \*</sup>, Jin-Chao Wei<sup>3</sup>, Peng Li<sup>3</sup>, and Shuang-Peng Wang<sup>2, \*</sup>

<sup>1</sup> *State Key Laboratory of High Power Semiconductor Lasers, Changchun University of Science and Technology, Changchun 130022, China.*

<sup>2</sup> *Institute of Applied Physics and Materials Engineering, University of Macau, Taipa, Macao SAR 999078, China*

<sup>3</sup> *State Key Laboratory of Quality Research in Chinese Medicine, Institute of Chinese Medical Sciences, University of Macau, Macau, 999078, China*

\*Corresponding Author

Zhi-Peng WEI: [zpweicust@126.com](mailto:zpweicust@126.com) (Email)

Shuang-Peng WANG: [spwang@um.edu.mo](mailto:spwang@um.edu.mo) (Email); +853 8822 4048 (Tel.)

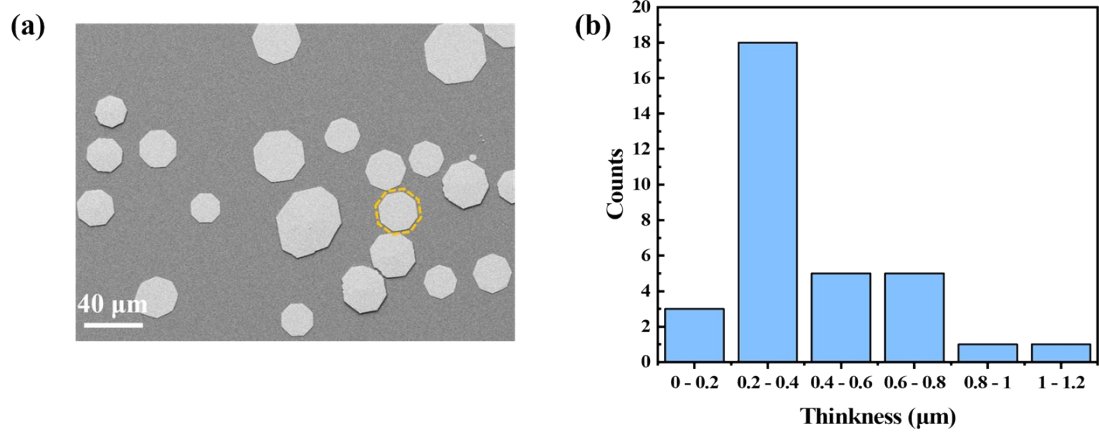

**Figure S1** a) SEM image of the  $\text{BA}_2\text{MA}_2\text{Pb}_3\text{I}_{10}$  nanosheets with varying thickness during a single transfer process. b) Height size distribution of perovskite nanosheets in the substrate, determined by AFM.

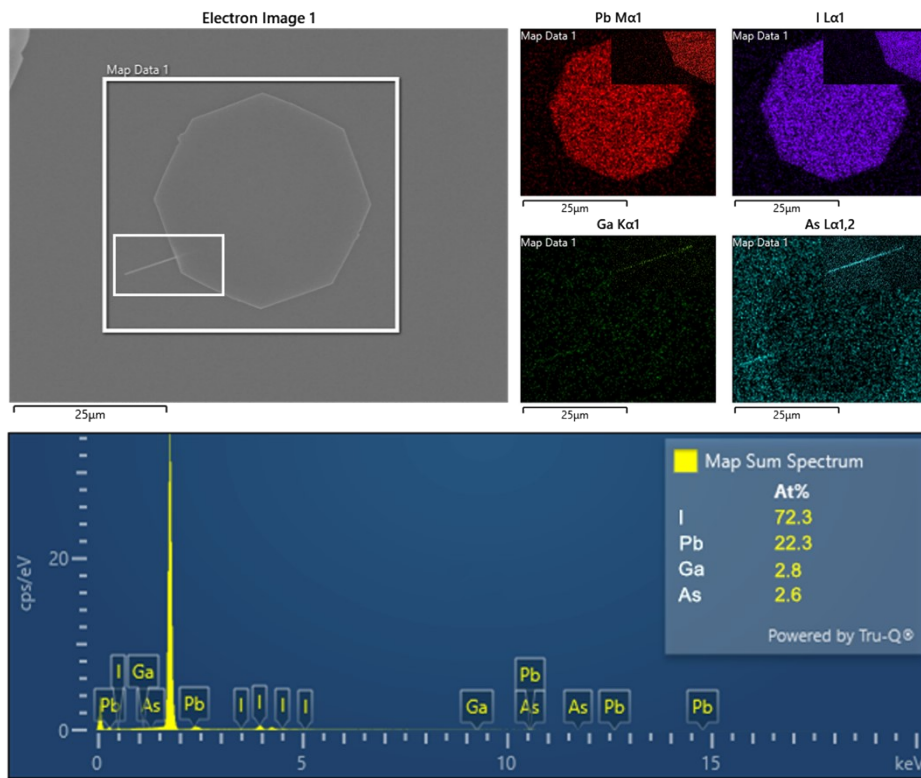

Figure S2 The EDS element mapping images of GaAs/BA<sub>2</sub>MA<sub>2</sub>Pb<sub>3</sub>I<sub>10</sub> heterostructure.

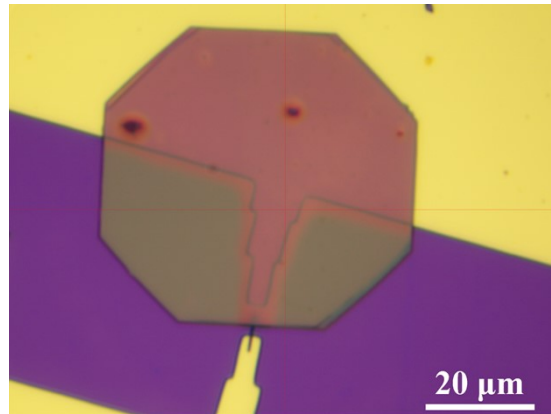

**Figure S3 Optical micrograph image of the GaAs/BA<sub>2</sub>MA<sub>2</sub>Pb<sub>3</sub>I<sub>10</sub> heterostructure photodetector.**

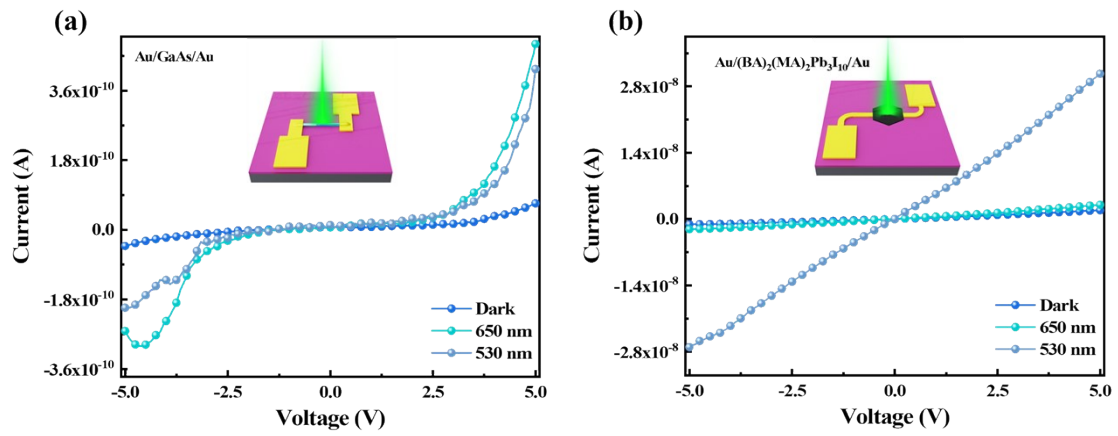

**Figure S4** The  $I$ - $V$  curves of devices under dark and 530 nm and 650 nm laser excitation based on GaAs (a), and  $\text{BA}_2\text{MA}_2\text{Pb}_3\text{I}_{10}$  (b) devices, respectively.

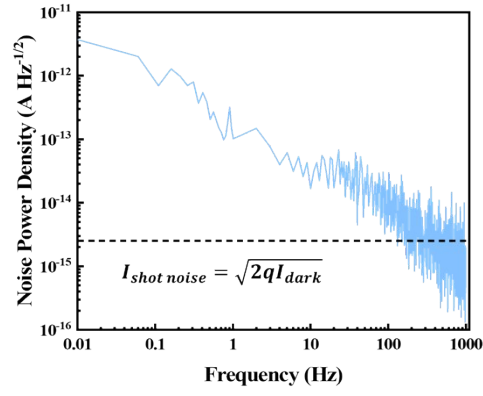

**Figure S5** The noise power density spectra of the device ranging from 0.01 to 1000 Hz at -5 V bias.

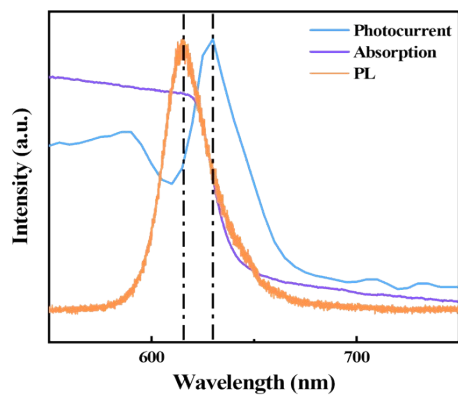

**Figure S6 Comparison of the device normalized photocurrent with the  $\text{BA}_2\text{MA}_2\text{Pb}_3\text{I}_{10}$  PL and absorption spectrum.**
